# Supplementary material for: Cardiovascular risk factors and outcomes in early rheumatoid arthritis: a population-based study
Source: PubMed Central journal article supplement — Heart. 2020 Mar 24;106(20):1566–72. doi: 10.1136/heartjnl-2019-316193 (PMC7525791; doi:10.1136/heartjnl-2019-316193), 2020-03-24
Supplement: heartjnl-2019-316193supp001.pdf [file heartjnl-2019-316193supp001.pdf]

**SUPPLEMENTARY MATERIAL FOR:****Cardiovascular risk factors and outcomes in early rheumatoid arthritis: a population-based study**

**Authors:** Elena Nikiphorou, Simon de Lusignan, Christian Mallen, Kaivan Khavandi, Gabriella Bedarida, Christopher Buckley, James Galloway, Karim Raza

### Appendix 1. The Read codes used to define RA cases and the study outcomes

The Read codes and drug lists used to identify cases of RA, exclusion conditions and study outcomes are listed below. We used the validated case definition approach used by Muller et al:

Criterion 1: At least one diagnostic Read code for RA and at least one appropriate prescription of a disease modifying antirheumatic drug (DMARD) with no alternative indication for the DMARD;

or

Criterion 2: all three of the following:

- a) two or more diagnostic Read codes for RA (on different dates);
- b) no alternative diagnosis after the final RA code;
- c) RA code in group A, opposed to only group B.

Muller S, Hider SL, Raza K, et al. An algorithm to identify rheumatoid arthritis in primary care: a Clinical Practice Research Datalink study. *BMJ open* 2015; 5: e009309.

| Rheumatoid arthritis |                                                                  |
|----------------------|------------------------------------------------------------------|
| Group A codes        |                                                                  |
| N040.                | Rheumatoid arthritis                                             |
| N0400                | Rheumatoid arthritis of cervical spine                           |
| N0401                | Other rheumatoid arthritis of spine                              |
| N0402                | Rheumatoid arthritis of shoulder                                 |
| N0403                | Rheumatoid arthritis of sternoclavicular joint                   |
| N0404                | Rheumatoid arthritis of acromioclavicular joint                  |
| N0405                | Rheumatoid arthritis of elbow                                    |
| N0406                | Rheumatoid arthritis of distal radio-ulnar joint                 |
| N0407                | Rheumatoid arthritis of wrist                                    |
| N0408                | Rheumatoid arthritis of metacarpophalangeal joint                |
| N0409                | Rheumatoid arthritis of proximal interphalangeal joint of finger |
| N040A                | Rheumatoid arthritis of distal interphalangeal joint of finger   |
| N040B                | Rheumatoid arthritis of hip                                      |
| N040C                | Rheumatoid arthritis of sacro-iliac joint                        |
| N040D                | Rheumatoid arthritis of knee                                     |
| N040E                | Rheumatoid arthritis of tibio-fibular joint                      |
| N040F                | Rheumatoid arthritis of ankle                                    |
| N040G                | Rheumatoid arthritis of subtalar joint                           |
| N040H                | Rheumatoid arthritis of talonavicular joint                      |
| N040J                | Rheumatoid arthritis of other tarsal joint                       |
| N040K                | Rheumatoid arthritis of 1st metatarsophalangeal joint            |
| N040L                | Rheumatoid arthritis of lesser metatarsophalangeal joint         |

|                      |                                                                     |
|----------------------|---------------------------------------------------------------------|
| N040M                | Rheumatoid arthritis of interphalangeal joint of toe                |
| N040S                | Rheumatoid arthritis - multiple joint                               |
| N040T                | Flare of rheumatoid arthritis                                       |
| Nyu10                | [X]Rheumatoid arthritis with involvement of other organs or systems |
| Nyu11                | [X]Other seropositive rheumatoid arthritis                          |
| Nyu12                | [X]Other specified rheumatoid arthritis                             |
| N047.                | Seropositive erosive rheumatoid arthritis                           |
| N04X.                | Seropositive rheumatoid arthritis, unspecified                      |
| <b>Group B codes</b> |                                                                     |
| N040N                | Rheumatoid vasculitis                                               |
| N040P                | Seronegative rheumatoid arthritis                                   |
| N040Q                | Rheumatoid bursitis                                                 |
| N040R                | Rheumatoid nodule                                                   |
| H570.                | Rheumatoid lung                                                     |
| G5yA.                | Rheumatoid carditis                                                 |
| N041.                | Felty's syndrome                                                    |
| N042.                | Other rheumatoid arthropathy with visceral or systemic involvement  |
| N0420                | Rheumatic carditis                                                  |
| N0422                | Rheumatoid nodule                                                   |
| N042z                | Rheumatoid arthropathy with visceral or systemic involvement NOS    |
| N043.                | Juvenile rheumatoid arthritis - Still's disease                     |
| N0430                | Juvenile rheumatoid arthropathy unspecified                         |
| N0431                | Acute polyarticular juvenile rheumatoid arthritis                   |
| N0432                | Pauciarticular juvenile rheumatoid arthritis                        |
| N0433                | Monarticular juvenile rheumatoid arthritis                          |
| N043z                | Juvenile rheumatoid arthritis NOS                                   |
| N04y0                | Rheumatoid lung                                                     |
| 66H..                | Rheumatol. disorder monitoring                                      |
| 66H1.                | Rheumat. initial assessment                                         |
| 66H2.                | Rheumat. follow-up assessment                                       |
| 66H3.                | Rheumat.dis.- joints affected                                       |
| 66H4.                | Rheumat. symptom change                                             |
| 66H5.                | Rheumat. drug side effect                                           |
| 66H6.                | Rheumat. treatment change                                           |
| 66H7.                | Rheumat.dis.treatment started                                       |
| 66H8.                | Rheumat.dis.treatment stopped                                       |
| 66H9.                | Rheumatology management plan given                                  |
| 66HA.                | Rheumatology drug monitoring                                        |
| 66HB.                | Rheumatology disorder annual review                                 |
| 66HB0                | Rheumatoid arthritis annual review                                  |
| 66HC.                | Rheumatic disorder annual review invitation                         |
| 66HZ.                | Rheumatol.dis. monitoring NOS                                       |
| F3964                | Myopathy due to rheumatoid arthritis                                |

| <b>Ankylosing spondylitis</b> |                                 |
|-------------------------------|---------------------------------|
| N100.                         | Ankylosing spondylitis          |
| N0450                         | Juvenile ankylosing spondylitis |

| <b>Psoriatic arthritis</b> |                                              |
|----------------------------|----------------------------------------------|
| M160.                      | Psoriatic arthropathy                        |
| M1601                      | Distal interphalangeal psoriatic arthropathy |
| M160z                      | Psoriatic arthropathy NOS                    |
| Nyu13                      | [X]Other psoriatic arthropathies             |
| M1600                      | Psoriasis spondylitica                       |
| M1602                      | Arthritis mutilans                           |

| <b>Myocardial infarction</b> |                                                            |
|------------------------------|------------------------------------------------------------|
| 323..                        | ECG: myocardial infarction                                 |
| 3233.                        | ECG: antero-septal infarct.                                |
| 3234.                        | ECG:posterior/inferior infarct                             |
| 3235.                        | ECG: subendocardial infarct                                |
| 3236.                        | ECG: lateral infarction                                    |
| 323Z.                        | ECG: myocardial infarct NOS                                |
| G30..                        | Acute myocardial infarction                                |
| G300.                        | Acute anterolateral infarction                             |
| G301.                        | Other specified anterior myocardial infarction             |
| G3010                        | Acute anteroapical infarction                              |
| G3011                        | Acute anteroseptal infarction                              |
| G301z                        | Anterior myocardial infarction NOS                         |
| G302.                        | Acute inferolateral infarction                             |
| G303.                        | Acute inferoposterior infarction                           |
| G304.                        | Posterior myocardial infarction NOS                        |
| G305.                        | Lateral myocardial infarction NOS                          |
| G306.                        | True posterior myocardial infarction                       |
| G307.                        | Acute subendocardial infarction                            |
| G3070                        | Acute non-Q wave infarction                                |
| G3071                        | Acute non-ST segment elevation myocardial infarction       |
| G308.                        | Inferior myocardial infarction NOS                         |
| G309.                        | Acute Q-wave infarct                                       |
| G30B.                        | Acute posterolateral myocardial infarction                 |
| G30X.                        | Acute transmural myocardial infarction of unspecified site |
| G30X0                        | Acute ST segment elevation myocardial infarction           |
| G30y.                        | Other acute myocardial infarction                          |
| G30y0                        | Acute atrial infarction                                    |
| G30y1                        | Acute papillary muscle infarction                          |
| G30y2                        | Acute septal infarction                                    |
| G30yz                        | Other acute myocardial infarction NOS                      |
| G30z.                        | Acute myocardial infarction NOS                            |

|       |                                                                                                                         |
|-------|-------------------------------------------------------------------------------------------------------------------------|
| G310. | Postmyocardial infarction syndrome                                                                                      |
| G32.. | Old myocardial infarction                                                                                               |
| G35.. | Subsequent myocardial infarction                                                                                        |
| G350. | Subsequent myocardial infarction of anterior wall                                                                       |
| G351. | Subsequent myocardial infarction of inferior wall                                                                       |
| G353. | Subsequent myocardial infarction of other sites                                                                         |
| G35X. | Subsequent myocardial infarction of unspecified site                                                                    |
| G36.. | Certain current complications following acute myocardial infarction                                                     |
| G360. | Haemopericardium as current complication following acute myocardial infarction                                          |
| G361. | Atrial septal defect as current complication following acute myocardial infarction                                      |
| G362. | Ventricular septal defect as current complication following acute myocardial infarction                                 |
| G363. | Rupture of cardiac wall without haemopericardium as current complication following acute myocardial infarction          |
| G364. | Rupture of chordae tendinae as current complication following acute myocardial infarction                               |
| G365. | Rupture of papillary muscle as current complication following acute myocardial infarction                               |
| G366. | Thrombosis of atrium, auricular appendage, and ventricle as current complications following acute myocardial infarction |
| G38.. | Postoperative myocardial infarction                                                                                     |
| G380. | Postoperative transmural myocardial infarction of anterior wall                                                         |
| G381. | Postoperative transmural myocardial infarction of inferior wall                                                         |
| G382. | Postoperative transmural myocardial infarction of other sites                                                           |
| G383. | Postoperative transmural myocardial infarction of unspecified site                                                      |
| G384. | Postoperative subendocardial myocardial infarction                                                                      |
| G38z. | Postoperative myocardial infarction, unspecified                                                                        |

|               |                                                             |
|---------------|-------------------------------------------------------------|
| <b>Stroke</b> |                                                             |
| Fyu56         | [X]Other lacunar syndromes                                  |
| G63y0         | Cerebral infarct due to thrombosis of precerebral arteries  |
| G63y1         | Cerebral infarction due to embolism of precerebral arteries |
| G64..         | Cerebral arterial occlusion                                 |
| G640.         | Cerebral thrombosis                                         |
| G6400         | Cerebral infarction due to thrombosis of cerebral arteries  |
| G641.         | Cerebral embolism                                           |
| G6410         | Cerebral infarction due to embolism of cerebral arteries    |
| G64z.         | Cerebral infarction NOS                                     |
| G64z0         | Brainstem infarction                                        |
| G64z1         | Wallenberg syndrome                                         |
| G64z2         | Left sided cerebral infarction                              |
| G64z3         | Right sided cerebral infarction                             |
| G64z4         | Infarction of basal ganglia                                 |
| G66..         | Stroke and cerebrovascular accident unspecified             |
| G660.         | Middle cerebral artery syndrome                             |

|       |                                                                                         |
|-------|-----------------------------------------------------------------------------------------|
| G661. | Anterior cerebral artery syndrome                                                       |
| G662. | Posterior cerebral artery syndrome                                                      |
| G663. | Brain stem stroke syndrome                                                              |
| G664. | Cerebellar stroke syndrome                                                              |
| G665. | Pure motor lacunar syndrome                                                             |
| G666. | Pure sensory lacunar syndrome                                                           |
| G667. | Left sided CVA                                                                          |
| G668. | Right sided CVA                                                                         |
| G6760 | Cerebral infarction due to cerebral venous thrombosis, nonpyogenic                      |
| G6W.. | Cerebral infarction due to unspecified occlusion or stenosis of precerebral arteries    |
| G6X.. | Cerebral infarction due to unspecified occlusion or stenosis of cerebral arteries       |
| Gyu63 | [X]Cerebral infarction due to unspecified occlusion or stenosis of cerebral arteries    |
| Gyu64 | [X]Other cerebral infarction                                                            |
| Gyu65 | [X]Occlusion and stenosis of other precerebral arteries                                 |
| Gyu66 | [X]Occlusion and stenosis of other cerebral arteries                                    |
| Gyu6G | [X]Cerebral infarction due to unspecified occlusion or stenosis of precerebral arteries |

| <b>Heart failure</b> |                                                        |
|----------------------|--------------------------------------------------------|
| 1O1..                | Heart failure confirmed                                |
| 662f.                | New York Heart Association classification - class I    |
| 662g.                | New York Heart Association classification - class II   |
| 662h.                | New York Heart Association classification - class III  |
| 662i.                | New York Heart Association classification - class IV   |
| 662p.                | Heart failure 6 month review                           |
| 662T.                | Congestive heart failure monitoring                    |
| 662W.                | Heart failure annual review                            |
| 679W1                | Education about deteriorating heart failure            |
| 679X.                | Heart failure education                                |
| 67D4.                | Heart failure information given to patient             |
| 7900.                | Transplantation of heart and lung                      |
| 79000                | Allotransplantation of heart and lung                  |
| 79001                | Revision of transplantation of heart and lung          |
| 7900y                | Other specified transplantation of heart and lung      |
| 7900z                | Transplantation of heart and lung NOS                  |
| 7901.                | Other transplantation of heart                         |
| 79010                | Allotransplantation of heart NEC                       |
| 79011                | Xenotransplantation of heart                           |
| 79013                | Piggyback transplantation of heart                     |
| 79014                | Revision of implantation of prosthetic heart           |
| 79015                | Revision of transplantation of heart NEC               |
| 7901y                | Other specified other transplantation of heart         |
| 7901z                | Other transplantation of heart NOS                     |
| 7933.                | Transluminal heart assist operations                   |
| 79330                | Transluminal insertion of pulsation balloon into aorta |

|       |                                                                                             |
|-------|---------------------------------------------------------------------------------------------|
| 79331 | Transluminal insertion of heart assist system NEC                                           |
| 79332 | Transluminal maintenance of heart assist system                                             |
| 79334 | Implantation of ventricular assist device                                                   |
| 79335 | Implantation of right ventricular assist device                                             |
| 79336 | Implantation of left ventricular assist device                                              |
| 79337 | Implantation of biventricular assist device                                                 |
| 7933y | Other specified transluminal heart assist operation                                         |
| 7933z | Transluminal heart assist operation NOS                                                     |
| 7936J | Implantation of intravenous biventricular cardiac pacemaker system                          |
| 79379 | Implantation of biventricular cardiac pacemaker system                                      |
| 793L. | Open heart assist operations                                                                |
| 793L0 | Open implantation of ventricular assist device                                              |
| 793Ly | Other specified open heart assist operations                                                |
| 793Lz | Open heart assist operations NOS                                                            |
| 8B29. | Cardiac failure therapy                                                                     |
| 8CeC. | Preferred place of care for next exacerbation of heart failure                              |
| 8CL3. | Heart failure care plan discussed with patient                                              |
| 8CMK. | Has heart failure management plan                                                           |
| 8CMW8 | Heart failure clinical pathway                                                              |
| 8H2S. | Admit heart failure emergency                                                               |
| 8HBE. | Heart failure follow-up                                                                     |
| 8HHb. | Referral to heart failure nurse                                                             |
| 8HHz. | Referral to heart failure exercise programme                                                |
| 8Hk0. | Referred to heart failure education group                                                   |
| 8HTL. | Referral to heart failure clinic                                                            |
| 8HTL0 | Referral to rapid access heart failure clinic                                               |
| 9N0k. | Seen in heart failure clinic                                                                |
| 9N2p. | Seen by community heart failure nurse                                                       |
| 9Or0. | Heart failure review completed                                                              |
| G1yz1 | Rheumatic left ventricular failure                                                          |
| G2101 | Malignant hypertensive heart disease with congestive cardiac failure                        |
| G2111 | Benign hypertensive heart disease with congestive cardiac failure                           |
| G21z1 | Hypertensive heart disease NOS with congestive cardiac failure                              |
| G232. | Hypertensive heart and renal disease with (congestive) heart failure                        |
| G234. | Hypertensive heart and renal disease with both (congestive) heart failure and renal failure |
| G58.. | Heart failure                                                                               |
| G580. | Congestive heart failure                                                                    |
| G5800 | Acute congestive heart failure                                                              |
| G5801 | Chronic congestive heart failure                                                            |
| G5802 | Decompensated cardiac failure                                                               |
| G5803 | Compensated cardiac failure                                                                 |
| G5804 | Congestive heart failure due to valvular disease                                            |
| G581. | Left ventricular failure                                                                    |
| G5810 | Acute left ventricular failure                                                              |

|       |                                             |
|-------|---------------------------------------------|
| G582. | Acute heart failure                         |
| G583. | Heart failure with normal ejection fraction |
| G584. | Right ventricular failure                   |
| G58z. | Heart failure NOS                           |
| Q48y1 | Congenital cardiac failure                  |
| Q490. | Neonatal cardiac failure                    |

| <b>Drug Class</b>                                                      | <b>Medications</b>                                                                                                                                              |
|------------------------------------------------------------------------|-----------------------------------------------------------------------------------------------------------------------------------------------------------------|
| Conventional synthetic disease modifying anti-rheumatic drugs (DMARDs) | Azathioprine, Chloroquine, Ciclosporin, Gold, Hydroxychloroquine, Leflunomide, Methotrexate, Mycophenolate, Penicillamine, Sirolimus, Sulfasalazine, Tacrolimus |
| Biologic/ targeted synthetic DMARDs                                    | Abatacept*, Adalimumab, Baricitinib*, Certolizumab*, Etanercept, Golimumab*, Infliximab, Rituximab, Tocilizumab*, Tofacitinib*                                  |

\* These medications were searched for but no prescriptions were found in the primary care record during the study period.



## Appendix 2. The exclusion of false incident cases of RA and case matching approach

### *Incident cases*

We have found that the majority of newly registered patients with RA commonly have their historic records transferred from their previous primary care practice and therefore have historic diagnosis codes recorded with their current primary care practice which demonstrate that their RA diagnosis precedes their registration. These patients do not however have data on historic blood test results or prescriptions and are therefore excluded from our analysis. Furthermore, primary care providers can input diagnosis codes retrospectively into the record enabling them to capture the historic onset of disease prior to registration even if these records are not transferred from a previous practice. These patients are also not included in our cohort. False incident cases are therefore unlikely after the GP practice registration date and we see only a small excess of probable false incident cases after the practice registration date and these occur before or during the first three months of registration (supplementary figure 1). We have excluded incident cases within this three-month period.

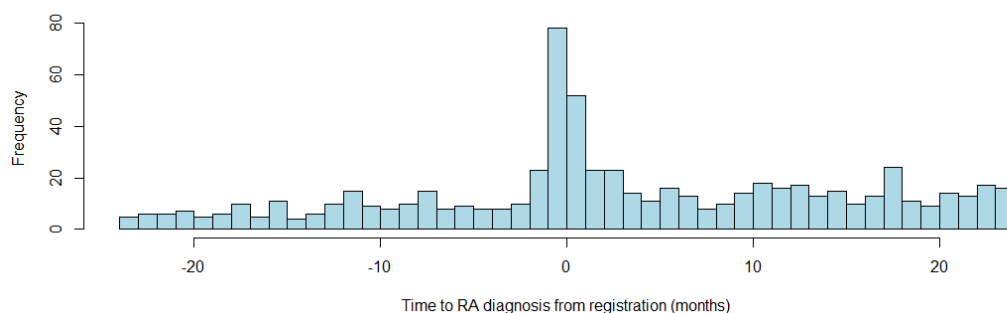

**Supplementary figure 1.** The apparent incident rate of RA relative to the patient's registration date with their GP (at time = 0). A false incidence peak can be seen around this time but the incidence has fallen to the background level within three months of the registration date.

### *Notes on the matching approach used*

Patients with RA were matched by age and gender at GP practice level with individuals without RA who were registered at the same time that their case counterpart was diagnosed with RA. The index date for controls was defined as the RA diagnosis date of their matched counterpart. The pool of available controls for each case was therefore those people registered at their own GP practice at the time of their diagnosis. We elected to use a matching ratio of 1:1 for cases and controls. Whilst a higher ratio of controls would have increased precision of estimates in this group and also comparison estimates we found that by increasing the matching ratio we began to lose some of the RA cases. As this effect predominantly affected smaller GP practices (with a small available pool of controls) and therefore potentially introduced an additional source of bias we therefore elected to use a 1:1 matching ratio.

**Appendix 3. Medication use among individuals with RA within 30 days of diagnosis and at 3 years after diagnosis.**

|                 | <b>Diagnosis<br/>(n=6591)<br/>n (%)</b> | <b>3 years after diagnosis<br/>(n=4646)<br/>n (%)</b> | <b>p</b> |
|-----------------|-----------------------------------------|-------------------------------------------------------|----------|
| Glucocorticoids | 393 (6.0)                               | 2,498 (53.8)                                          | <0.001   |
| Methotrexate    | 260 (3.9)                               | 2,090 (45.0)                                          | <0.001   |
| csDMARD         | 398 (6.0)                               | 2,158 (46.4)                                          | <0.001   |
| bDMARD          | 10 (0.2)                                | 122 (2.6)                                             | <0.001   |

csDMARD=conventional synthetic disease-modifying anti-rheumatic drug; bDMARD= biologic disease-modifying anti-rheumatic drug.

**Appendix 4. Cardiovascular events preceding a diagnosis of rheumatoid arthritis**

|                                       | RA (n=6,591)<br>n (%) | No RA (n=6,591)<br>n (%) | p     |
|---------------------------------------|-----------------------|--------------------------|-------|
| Cardiovascular event*                 |                       |                          |       |
| Within 5 years of diagnosis           | 226 (3.4)             | 184 (2.8)                | 0.036 |
| Within 5 to 10 years of diagnosis     | 124 (1.9)             | 118 (1.8)                | 0.741 |
| More than 10 years prior to diagnosis | 154 (2.3)             | 128 (1.9)                | 0.123 |

RA = rheumatoid arthritis. \*Myocardial infarction, heart failure or stroke

**Appendix 5. Association of cardiovascular risk factors and the composite endpoint (myocardial infarction, stroke, or heart failure) among individuals with and without RA**

|                          | RA<br>HR (95% CI) | P value | No RA<br>HR (95% CI) | P value |
|--------------------------|-------------------|---------|----------------------|---------|
| Age (years)              | 1.06 (1.05-1.07)  | <0.001  | 1.07 (1.05-1.08)     | <0.001  |
| Male                     | 1.71 (1.43-2.05)  | <0.001  | 1.63 (1.29-2.07)     | <0.001  |
| Non-white ethnicity      | 0.67 (0.39-1.15)  | 0.144   | 1.22 (0.56-2.62)     | 0.629   |
| Current smoker           | 1.51 (1.14-1.98)  | 0.003   | 1.34 (0.92-1.93)     | 0.125   |
| BMI (kg/m <sup>2</sup> ) | 1.03 (1.02-1.05)  | <0.001  | 1.02 (0.99-1.04)     | 0.123   |
| LDL (mmol/L)             | 0.91 (0.83-1.00)  | 0.049   | 0.92 (0.80-1.05)     | 0.217   |
| Systolic BP (mmHg)       | 1.00 (0.99-1.00)  | 0.285   | 1.01 (1.00-1.01)     | 0.185   |
| CKD                      | 1.54 (1.20-1.98)  | 0.001   | 1.41 (1.07-1.84)     | 0.013   |
| Diabetes                 | 1.39 (1.10-1.77)  | 0.006   | 1.07 (0.78-1.48)     | 0.662   |
| Steroid use              | 1.30 (1.02-1.65)  | 0.033   | 1.15 (0.61-2.17)     | 0.667   |
| csDMARD                  | 1.06 (0.81-1.38)  | 0.674   | 1.08 (0.15-7.77)     | 0.943   |
| Seropositivity           | 1.03 (0.84-1.27)  | 0.752   | 1.90 (1.08-3.34)     | 0.026   |
| CRP (mg/dL)              | 1.00 (1.00-1.00)  | 0.294   | 1.00 (1.00-1.01)     | 0.327   |

BMI=body mass index; BP= blood pressure; CRP= C-reactive protein; LDL= low-density lipoprotein; csDMARD=conventional synthetic disease-modifying anti-rheumatic drug.

**Appendix 6. Association of cardiovascular risk factors and the primary composite endpoint (myocardial infarction, stroke, or heart failure) adjusted for the presence of CVD (stroke, myocardial infarction and heart failure) at baseline in people with rheumatoid arthritis**

|                          | <b>HR (95% CI)</b> | <b>P value</b> |
|--------------------------|--------------------|----------------|
| Age (years)              | 1.06 (1.05-1.07)   | <0.001         |
| Male                     | 1.60 (1.31-1.96)   | <0.001         |
| Non-white ethnicity      | 0.95 (0.36-2.51)   | 0.919          |
| Current smoker           | 1.44 (1.07-1.96)   | 0.018          |
| BMI (kg/m <sup>2</sup> ) | 1.02 (1.01-1.04)   | 0.009          |
| LDL (mmol/L)             | 0.89 (0.78-1.02)   | 0.112          |
| Systolic BP (mmHg)       | 1.00 (0.99-1.00)   | 0.627          |
| CKD                      | 1.61 (1.22-2.11)   | 0.001          |
| Diabetes                 | 1.46 (1.11-1.91)   | 0.007          |
| Steroid use              | 1.19 (0.91-1.55)   | 0.200          |
| DMARD                    | 0.97 (0.72-1.32)   | 0.869          |
| Seropositivity           | 1.09 (0.87-1.37)   | 0.432          |
| CRP (mg/dL)              | 1.00 (1.00-1.01)   | 0.163          |
| Myocardial infarction    | 0.87 (0.56-1.37)   | 0.556          |
| Stroke                   | 0.95 (0.64-1.42)   | 0.802          |
| Heart failure            | 1.14 (0.63-2.06)   | 0.660          |

BMI = body mass index; BP = blood pressure; CKD = chronic kidney disease; CRP = C-reactive protein; LDL= low-density lipoprotein; HR = hazard ratio; DMARD = disease-modifying anti-rheumatic drug.

**Appendix 7. Association of cardiovascular risk factors and the extended composite endpoint (myocardial infarction, stroke, heart failure, coronary artery disease, percutaneous coronary intervention, and angina) among individuals with and without RA**

|                          | RA               |         | No RA            |         |
|--------------------------|------------------|---------|------------------|---------|
|                          | HR (95% CI)      | P value | HR (95% CI)      | P value |
| Age (years)              | 1.06 (1.05-1.07) | <0.001  | 1.06 (1.05-1.08) | <0.001  |
| Male                     | 1.67 (1.40-2.01) | <0.001  | 1.47 (1.19-1.81) | <0.001  |
| Non-white ethnicity      | 1.09 (0.47-2.52) | 0.847   | 1.12 (0.51-2.50) | 0.781   |
| Current smoker           | 1.56 (1.20-2.04) | 0.001   | 1.36 (0.98-1.89) | 0.068   |
| BMI (kg/m <sup>2</sup> ) | 1.03 (1.01-1.05) | <0.001  | 1.03 (1.01-1.05) | 0.008   |
| LDL (mmol/L)             | 0.87 (0.78-0.97) | 0.017   | 0.90 (0.80-1.02) | 0.091   |
| Systolic BP (mmHg)       | 1.00 (0.99-1.00) | 0.277   | 1.00 (1.00-1.01) | 0.365   |
| CKD                      | 1.51 (1.18-1.93) | 0.001   | 1.35 (1.06-1.72) | 0.015   |
| Diabetes                 | 1.32 (1.04-1.69) | 0.025   | 1.08 (0.81-1.43) | 0.606   |
| Steroid use              | 1.28 (1.01-1.62) | 0.041   | 1.66 (0.97-2.86) | 0.067   |
| DMARD                    | 1.03 (0.79-1.35) | 0.817   | 1.08 (0.60-1.93) | 0.796   |
| Seropositivity           | 1.01 (0.83-1.25) | 0.887   | 1.81 (0.44-7.33) | 0.409   |
| CRP (mg/dL)              | 1.00 (1.00-1.00) | 0.347   | 1.00 (1.00-1.01) | 0.176   |

BMI = body mass index; BP = blood pressure; CKD = chronic kidney disease; CRP = C-reactive protein; DMARD = disease-modifying anti-rheumatic drug; LDL = low-density lipoprotein; HR = hazard ratio; RA = rheumatoid arthritis.

**Appendix 8. Association of RA with the composite endpoint (myocardial infarction, stroke, or heart failure) in the overall cohort in an adjusted model with stratification by matched set.**

|                          | <b>HR (95% CI)</b> | <b>p</b> |
|--------------------------|--------------------|----------|
| RA                       | 1.33 (1.07-1.65)   | 0.010    |
| Non-white ethnicity      | 1.33 (0.65-2.73)   | 0.440    |
| Current smoker           | 1.41 (0.95-2.11)   | 0.092    |
| BMI (kg/m <sup>2</sup> ) | 1.02 (0.99-1.04)   | 0.191    |
| LDL (mmol/L)             | 0.89 (0.78-1.01)   | 0.075    |
| Systolic BP (mmHg)       | 1.00 (0.99-1.01)   | 0.540    |
| CKD                      | 1.52 (1.09-2.12)   | 0.013    |
| Diabetes                 | 1.36 (0.96-1.93)   | 0.084    |
| Glucocorticoid use       | 0.89 (0.58-1.36)   | 0.592    |
| DMARD use                | 0.88 (0.53-1.45)   | 0.621    |
| Seropositivity           | 1.19 (0.82-1.74)   | 0.352    |
| CRP (mg/dL)              | 1.00 (1.00-1.01)   | 0.246    |

Parameter estimates for covariates are shown for completeness. BMI = body mass index; BP = blood pressure; CKD = chronic kidney disease; CRP = C-reactive protein; DMARD = disease-modifying anti-rheumatic drug; LDL = low-density lipoprotein; HR = hazard ratio; RA = rheumatoid arthritis.
